# Supplementary material
Source: Springer Nature journal article supplement (https://www.springermedizin.de/resource/supplementary/12936_2011_1772_MOESM5_ESM.pdf/9541700)

# Dry Season

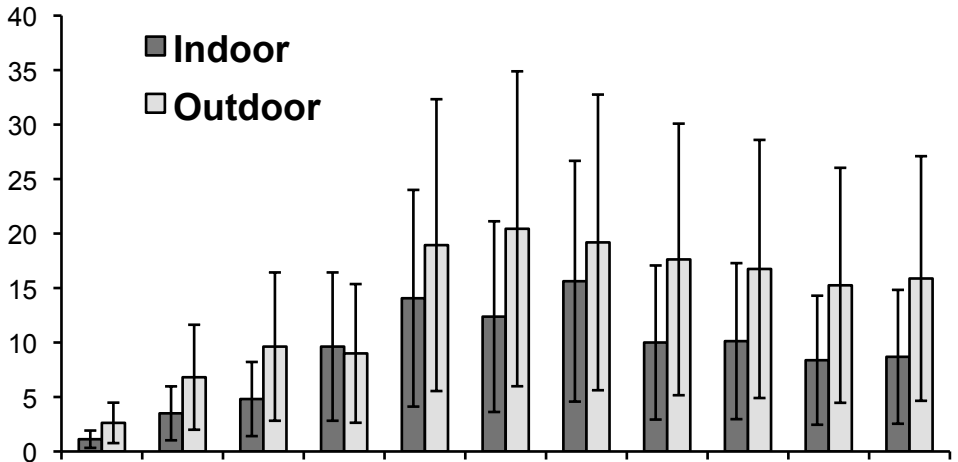

# Wet Season

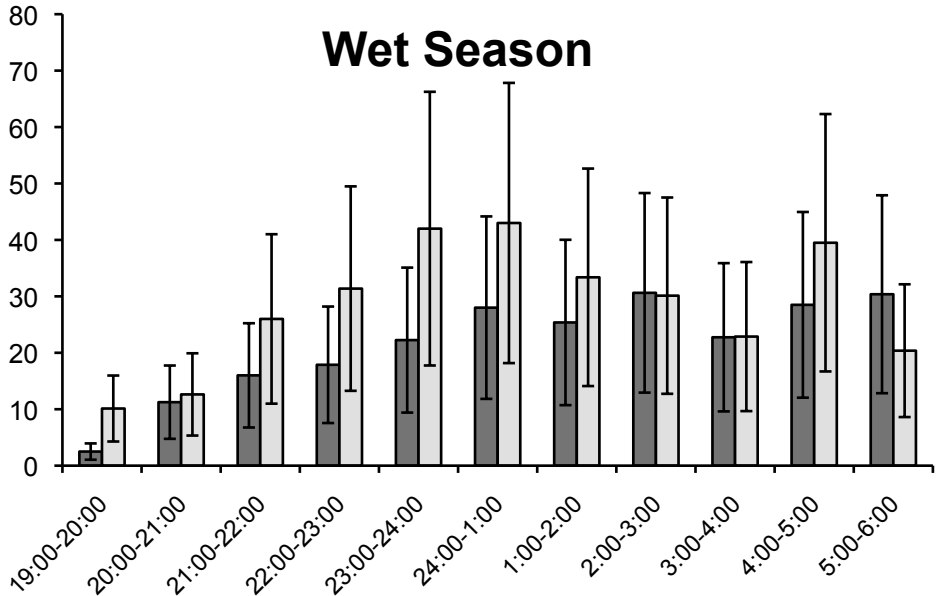

Hour of Collection

Supplement: MOESM5 [file 9541700]
